# Supplementary material
Source: PubMed Central journal article supplement (PMC3229176)
Supplement: NIHMS285924-supplement-Supplement.pdf [file NIHMS285924-supplement-Supplement.pdf]

## Appendix (Supplementary Tables)

**Table S1: Distribution of the number of NCTD restorations placed per patient, by reason for the restoration.**

| <i>Number of restorations<br/>per patient</i> | <b>AAE</b> | <b>Tooth<br/>fracture</b> | <b>Cosmetic<br/>reasons</b> | <b>Others</b> |
|-----------------------------------------------|------------|---------------------------|-----------------------------|---------------|
| <b>0</b> [N (%)]                              | 539 (62%)  | 504 (58%)                 | 834 (95%)                   | 729 (83%)     |
| <b>1</b> [N (%)]                              | 176 (20%)  | 338 (39%)                 | 18 (2%)                     | 109 (12%)     |
| <b>2</b> [N (%)]                              | 87 (10%)   | 27 (3%)                   | 7 (1%)                      | 21 (2%)       |
| <b>3</b> [N (%)]                              | 37 (4%)    | 3 (0%)                    | 5 (1%)                      | 7 (1%)        |
| <b>4</b> [N (%)]                              | 35 (4%)    | 2 (0%)                    | 10 (1%)                     | 8 (1%)        |
| <b>Total</b>                                  | 874 (100%) | 874 (100%)                | 874 (100%)                  | 874 (100%)    |

Counts are the number of patients, not the number of restorations. Percentages are within columns for each NCTD type of restoration. AAE: abrasion, abfraction, or erosion lesions; Others: developmental defects or hypoplasia, endodontically-treated teeth, or other unspecified reasons.

**Table S2: Multiple logistic regression analysis of the reasons for restoring NCTD.**

|                     |                            | AAE                 | Tooth fracture    | Cosmetic reasons | Others            |
|---------------------|----------------------------|---------------------|-------------------|------------------|-------------------|
| <b>Patient</b>      | <b>Gender</b>              | 0.4245              | 0.2175            | 0.6462           | 0.9526            |
|                     | <b>Age group in years</b>  | < 0.0001 (<0.0001)  | 0.7449            | 0.5217           | <0.0001 (<0.0001) |
| <b>Dentist</b>      | <b>Years of experience</b> | 0.4189              | 0.66              | 0.6492           | 0.541             |
|                     | <b>Visits per week</b>     | 0.0459              | 0.2606            | 0.7798           | 0.1991            |
|                     | <b>Risk assessment</b>     | 0.0871              | 0.3243            | 0.0819           | 0.2241            |
|                     | <b>Type of practice</b>    | 0.1914              | 0.0056            | xxxx             | 0.387             |
| <b>Tooth</b>        | <b>Type</b>                | < 0.0001 (< 0.0001) | < 0.0001 (0.0009) | 0.0002 (0.0003)  | < 0.0001 (0.0039) |
|                     | <b>Location</b>            | 0.973               | 0.2799            | 0.0969           | 0.001 (0.0014)    |
|                     | <b>Surface</b>             | < 0.0001 (<0.0001)  | < 0.0001(<0.0001) | 0.0495           | 0.0055 (0.0381)   |
| <b>DPBRN region</b> |                            | 0.0151 (0.0346)     | 0.0032            | xxxx             | 0.6992            |

The table shows p-values for univariate predictors of reasons for restoring NCTD and in parenthesis p-values for final multivariable models. Variables significant at  $p < 0.10$  in the individual models were included in the respective block model. Variables significant at  $p < 0.05$  in the block models were used along with DPBRN regions in a single multivariable model. Variables which were significant at  $p < 0.05$  in this model were retained in a final multivariable model. This process was conducted separately for each of the four reasons for NCTD restoration. AAE: abrasion, abfraction, or erosion lesions; Others: developmental defects or hypoplasia, endodontically-treated teeth, or other unspecified reasons; “xxxx”: the estimation algorithm failed to converge.

**Table S3: Number and percentage of DPBRN dentists and patients participating in the study and number and percentage of restorations placed by dentists from each DPBRN region.**

|                                  | <b>AL/MS</b> | <b>FL/GA</b> | <b>MN</b> | <b>PDA</b> | <b>SK</b> | <b>Total</b> |
|----------------------------------|--------------|--------------|-----------|------------|-----------|--------------|
| <b>Dentists</b> [N (%)]          | 46 (26)      | 32 (18)      | 24 (14)   | 40 (22)    | 36 (20)   | 178 (100)    |
| <b>Patients</b> [N (%)]          | 197 (23)     | 211 (24)     | 103 (12)  | 175 (20)   | 188 (21)  | 874 (100)    |
| <b>NCTD Restorations</b> [N (%)] | 332 (26)     | 316 (24)     | 131 (10)  | 268 (21)   | 254 (19)  | 1301 (100)   |

Percentages are within rows for each variable. NCTD: non-cariou tooth defects; AL/MS: Alabama/Mississippi; FL/GA: Florida/Georgia; MN: dentists employed by HealthPartners and other practitioners in Minnesota; PDA: Permanente Dental Associates in cooperation with Kaiser Permanente Center for Health Research, Portland, Oregon; and SK: Denmark, Norway, and Sweden.

**Table S4: Distribution of reasons for the restoration, by tooth characteristics and type of restorative material used.**

| <b>Restorative Material</b>    | <b>Tooth</b>                        | <b>AAE</b>   | <b>Tooth fracture</b> | <b>Cosmetic reasons</b> | <b>Others</b> | <b>Total</b> |
|--------------------------------|-------------------------------------|--------------|-----------------------|-------------------------|---------------|--------------|
| <b>Amalgam</b>                 | <b>Molar</b>                        | 3 (4%)       | 52 (78%)              | 0                       | 12 (18%)      | 67 (100%)    |
|                                | <b>Premolar</b>                     | 2 (8%)       | 16 (67%)              | 0                       | 6 (25%)       | 24 (100%)    |
|                                | <b>Anterior</b>                     | 0            | 0                     | 0                       | 0             | 0            |
|                                | <b>Maxillary</b>                    | 0            | 36 (90%)              | 0                       | 4 (10%)       | 10 (100%)    |
|                                | <b>Mandibular</b>                   | 5 (10%)      | 32 (63%)              | 0                       | 14 (27%)      | 51 (100%)    |
|                                | <b>O and/or I</b>                   | 1 (20%)      | 0                     | 0                       | 4 (80%)       | 5 (100%)     |
|                                | <b>M and/or D</b>                   | 0            | 21 (81%)              | 0                       | 5(19%)        | 26 (100%)    |
|                                | <b>B and/or L</b>                   | 3 (20%)      | 9 (60%)               | 0                       | 3(20%)        | 15 (100%)    |
|                                | <b>Multiple (O/I/M/D/B/L)</b>       | 1 (2%)       | 36 (86%)              | 0                       | 5(12%)        | 42(100%)     |
|                                | <b>Direct Composite Resin (RBC)</b> | <b>Molar</b> | 94 (35%)              | 81 (30%)                | 1 (0%)        | 91 (34%)     |
| <b>Premolar</b>                |                                     | 259 (81%)    | 33 (10%)              | 5 (2%)                  | 23 (7%)       | 320 (100%)   |
| <b>Anterior</b>                |                                     | 213 (45%)    | 159 (34%)             | 71 (15%)                | 28 (6%)       | 471 (100%)   |
| <b>Maxillary</b>               |                                     | 308 (51%)    | 169 (28%)             | 59 (10%)                | 65 (11%)      | 601 (100%)   |
| <b>Mandibular</b>              |                                     | 258 (56%)    | 104 (23%)             | 18 (4%)                 | 77 (17%)      | 457 (100%)   |
| <b>O and/or I</b>              |                                     | 74 (37%)     | 30 (15%)              | 13 (7%)                 | 82 (41%)      | 199 (100%)   |
| <b>M and/or D</b>              |                                     | 7 (14%)      | 20 (41%)              | 12 (24%)                | 10 (20%)      | 49 (100%)    |
| <b>B and/or L</b>              |                                     | 436 (82%)    | 46(9%)                | 16 (3%)                 | 32 (6%)       | 530 (100%)   |
| <b>Multiple (O/I/M/D/B/L)</b>  |                                     | 45 (17%)     | 173 (64%)             | 35 (13%)                | 16 (6%)       | 269 (100%)   |
| <b>Glass ionomer (GI/RMGI)</b> |                                     | <b>Molar</b> | 5 (50%)               | 2 (20%)                 | 0             | 3 (30%)      |
|                                | <b>Premolar</b>                     | 14 (88%)     | 1 (6%)                | 0                       | 1 (6%)        | 16 (100%)    |

|               |                               |          |          |         |          |           |
|---------------|-------------------------------|----------|----------|---------|----------|-----------|
|               | <b>Anterior</b>               | 5 (50%)  | 0        | 1 (10%) | 4 (40%)  | 10 (100%) |
|               | <b>Maxillary</b>              | 15 (75%) | 2 (10%)  | 1 (5%)  | 2 (10%)  | 20 (100%) |
|               | <b>Mandibular</b>             | 9 (56%)  | 1 (6%)   | 0       | 6 (38%)  | 16 (100%) |
|               | <b>O and/or I</b>             | 6 (75%)  | 0        | 0       | 2 (25%)  | 8 (100%)  |
|               | <b>M and/or D</b>             | 0        | 0        | 0       | 0        | 0         |
|               | <b>B and/or L</b>             | 15 (75%) | 0        | 0       | 5 (25%)  | 20 (100%) |
|               | <b>Multiple (O/I/M/D/B/L)</b> | 3 (38%)  | 3 (38%)  | 1 (13%) | 1 (13%)  | 8 (100%)  |
| <b>Others</b> | <b>Molar</b>                  | 0        | 25 (69%) | 0       | 11 (31%) | 36 (100%) |
|               | <b>Premolar</b>               | 0        | 11 (61%) | 1 (6%)  | 6 (33%)  | 18 (100%) |
|               | <b>Anterior</b>               | 4 (18%)  | 1 (5%)   | 8 (36%) | 9 (41%)  | 22 (100%) |
|               | <b>Maxillary</b>              | 4 (9%)   | 15 (34%) | 9 (20%) | 16 (36%) | 44 (100%) |
|               | <b>Mandibular</b>             | 0        | 22 (69%) | 0       | 10 (31%) | 32 (100%) |
|               | <b>O and/or I</b>             | 0        | 0        | 0       | 2 (100%) | 2 (100%)  |
|               | <b>M and/or D</b>             | 0        | 9 (100%) | 0       | 0        | 9 (100%)  |
|               | <b>B and/or L</b>             | 0        | 13 (57%) | 4 (17%) | 6 (26%)  | 23 (100%) |
|               | <b>Multiple (O/I/M/D/B/L)</b> | 4 (10%)  | 13 (33%) | 5 (13%) | 17 (44%) | 39 (100%) |

Counts are the number of restorations, not the number of restorative materials. AAE: abrasion, abfraction, or erosion lesions; Others: developmental defects or hypoplasia, endodontically-treated teeth, or other unspecified defects or reasons. RBC: directly placed resin-based composite; GI/RMGI: glass-ionomer or resin-modified glass-ionomer; Other materials: indirectly placed resin-based composite, ceramic or porcelain, cast gold or other metallic-based material, combined metal-ceramic material, and temporary restorative material; O: occlusal; M: mesial; D: distal; B: buccal/facial; L: lingual/palatal; and I: incisal tooth surfaces.
